# Supplementary material for: Predicting and controlling the reactivity of immune cell populations against cancer
Source: PubMed Central journal article supplement — Mol Syst Biol. 2009 Apr 28;5:265. doi: 10.1038/msb.2009.15 (PMC2683719; doi:10.1038/msb.2009.15), 2009-04-28
Supplement: msb200915-s1.pdf [file msb200915-s1.pdf]

# Supporting Online Material

## Supplementary Figures

**Figure S1. A schematic example of flow cytometry subpopulation frequency measurements used in order to determine TIL profile.** (A) Multi color flow cytometry was used for the measurement of multiple subpopulations frequencies within a single sample. By using a series of gates one can count the occurrence of each subpopulation and compute its fraction (i.e. the number of cells in a given subpopulation divided by the total number of cells). (B) Visualization of a TIL's subpopulation frequencies using a color coded vector.

**Figure S2. Different subpopulations show a wide range of fraction distributions.** Each subplot corresponds to a histogram of subpopulation fractions. The x-axis is the subpopulation fraction (i.e. the number of cells in a TIL that belong to a certain subpopulation divided by the total number of cells in the TIL). The y-axis counts the number of TILs (out of 91) showing each fraction.

**Figure S3. Single staining of surface markers reveals strong correlations and anti-correlations.** A correlation matrix between different receptor levels is shown (positive and negative correlations are indicated by hot and cold colors respectively). Rows and columns are clustered according to similarity (see Material and Methods). Several clusters emerge. For example, CD152, CD94 and CD85 are all in the same cluster consistent with their common function as inhibitory receptors. CD25 is also in that cluster, which might be explained by its tendency to appear on the surface of regulatory subpopulations.

**Figure S4. The subpopulation coefficients of each principle component show distinct patterns.** The subpopulation coefficients for the first and second (A and B respectively) principle components are shown (see PCA in Fig 5C). The first principle component is dominated by four types of subpopulation derivatives: CD4<sup>+</sup>, CD28<sup>-</sup>, CD8<sup>+</sup> and CD28<sup>-</sup>, where CD4<sup>+</sup> and CD28<sup>-</sup> have an opposite direction to CD8<sup>+</sup> and CD28<sup>-</sup>. Notably, the first principle component reflects a clear transition from non-reactivity to reactivity (even though the PCA algorithm did not take into account this type of information when computing the principle components coefficients). The second principle component contains a more complex mixture of subpopulations with no apparent phenotypic interpretation.

**Figure S5. Rational subpopulation manipulation can cause reactive TILs to become non-reactive and accompanied by a shift in subpopulation signature.**

(A) IFN- $\gamma$  levels of 5 TILs before and after rational subpopulation manipulation that was aimed at reducing TIL reactivity are compared. All 5 TILs show a significant decrease in TIL reactivity ranging from ~10 to ~400 fold decrease. (B) The shift in reactivity can be explained in terms of a shift in subpopulation signature. The subpopulation fractions of the 5 TILs prior and after subpopulation manipulation are shown. Rows and columns correspond to different subpopulations and TILs respectively. Two ways unsupervised clustering was performed on the rows and columns. The 5 reactive TILs prior to manipulation are designated by a blue color and the letter 'P'. The 5 TILs after manipulation are designated by the letter 'A' with red and yellow corresponding to non-reactive and reactive respectively. The shift in reactivity was accompanied by a shift in signature as indicated by the red arrows connecting each corresponding TIL pairs prior and after manipulation. (C) The transformation of a reactive TIL to a non-reactive one

can be described as a path between two points in the subpopulation space. A simple representation of the TIL sub-population space was generated by applying PCA, which is a method for dimensionality reduction (see Material and methods). The data was reduced from 35 to two dimensions. The x and y axes are principle components capturing 67% and 11% of the total variance in the data. The x-axis captures a shift from CD8+ and CD28- enriched subpopulation to CD4+ and CD28+ subpopulations while the y-axis reflects a combination of additional subpopulations. The figure shows a two distinct subspaces that are overpopulated with reactive and non-reactive TILs. The change in reactivity can be visualized as a path from a nonreactive TIL to a TIL that resides in the reactive subspace (for example see dotted arrow).

### **Supplementary Tables**

**Table SI. TILs information.** A tumor mass was removed from 27 patients from each of which two to five TILs were extracted resulting in 91 TILs. Of the 91 TILs, 39 were reactive and 52 non-reactive. The degree of reactivity in terms of IFN- $\gamma$  secretion as well as reactivity classification is specified for each TIL. Some TILs show different reactivity levels even when extracted from the same patient and same tumor mass.

**Table SII. A list of subpopulations used for TIL characterization.** (A) The subpopulations composition of each TIL was measured using flow cytometry. The staining included a combination of CD4 and CD8 together with the couples: CD25, CD56 or CD33, CD69 or CD28, CD152 or CD85, CD94. In addition the intracellular levels of perforin and granzymeB were measured in CD3 positive cells. This resulted in 102 features characterizing each TIL (see Excel S1). (B)

Subpopulation filtering procedure (see Material and Methods) resulted in a final data set containing 33 features (see also Excel S2).

**Table SIII. Reactivity changes of 12 fresh TILs before and after subpopulation manipulation.** Information on IFN- $\gamma$  levels of 12 fresh TILs prior and after subpopulation manipulation are shown. 10 of the 12 TILs were also characterized in terms of their subpopulation content. The table shows fraction of two major subpopulations, CD4 and CD8, prior and after manipulation. The two remaining TILs (marked ND) did not have sufficient number of cells for such a characterization. The clinical 200 pg/ml threshold on the levels of IFN- $\gamma$  was used to classify TILs as reactive and non-reactive. 9 of the 12 TILs become reactive after subpopulation manipulation with IFN- $\gamma$  fold change of up to 106 for TIL #2. We note that the viability of the manipulated cells was above 95%.

**Figure S1**

**A.**

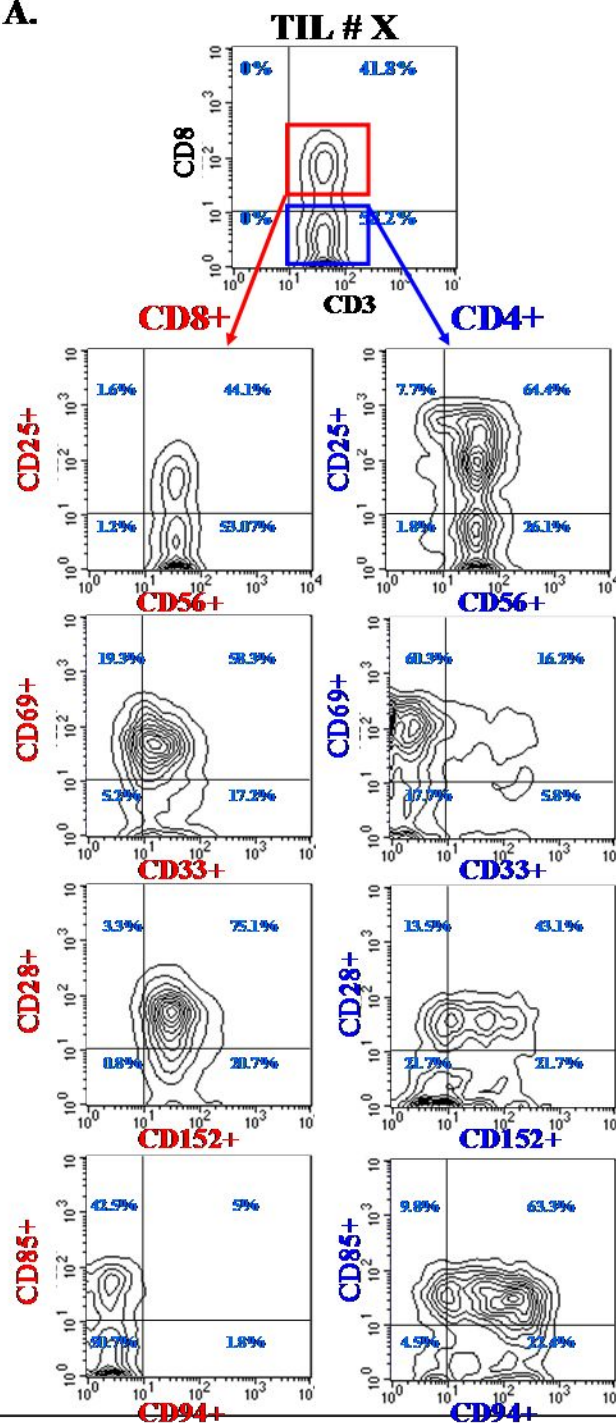

**B.**

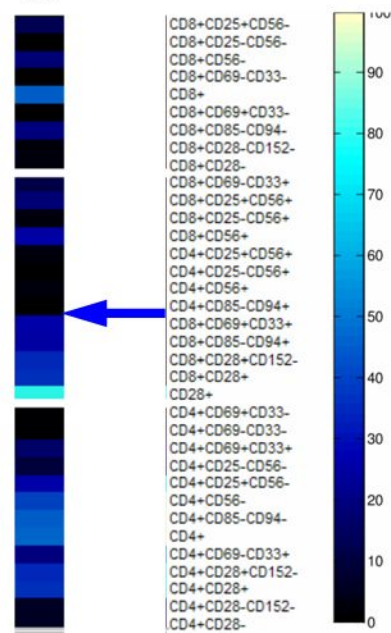

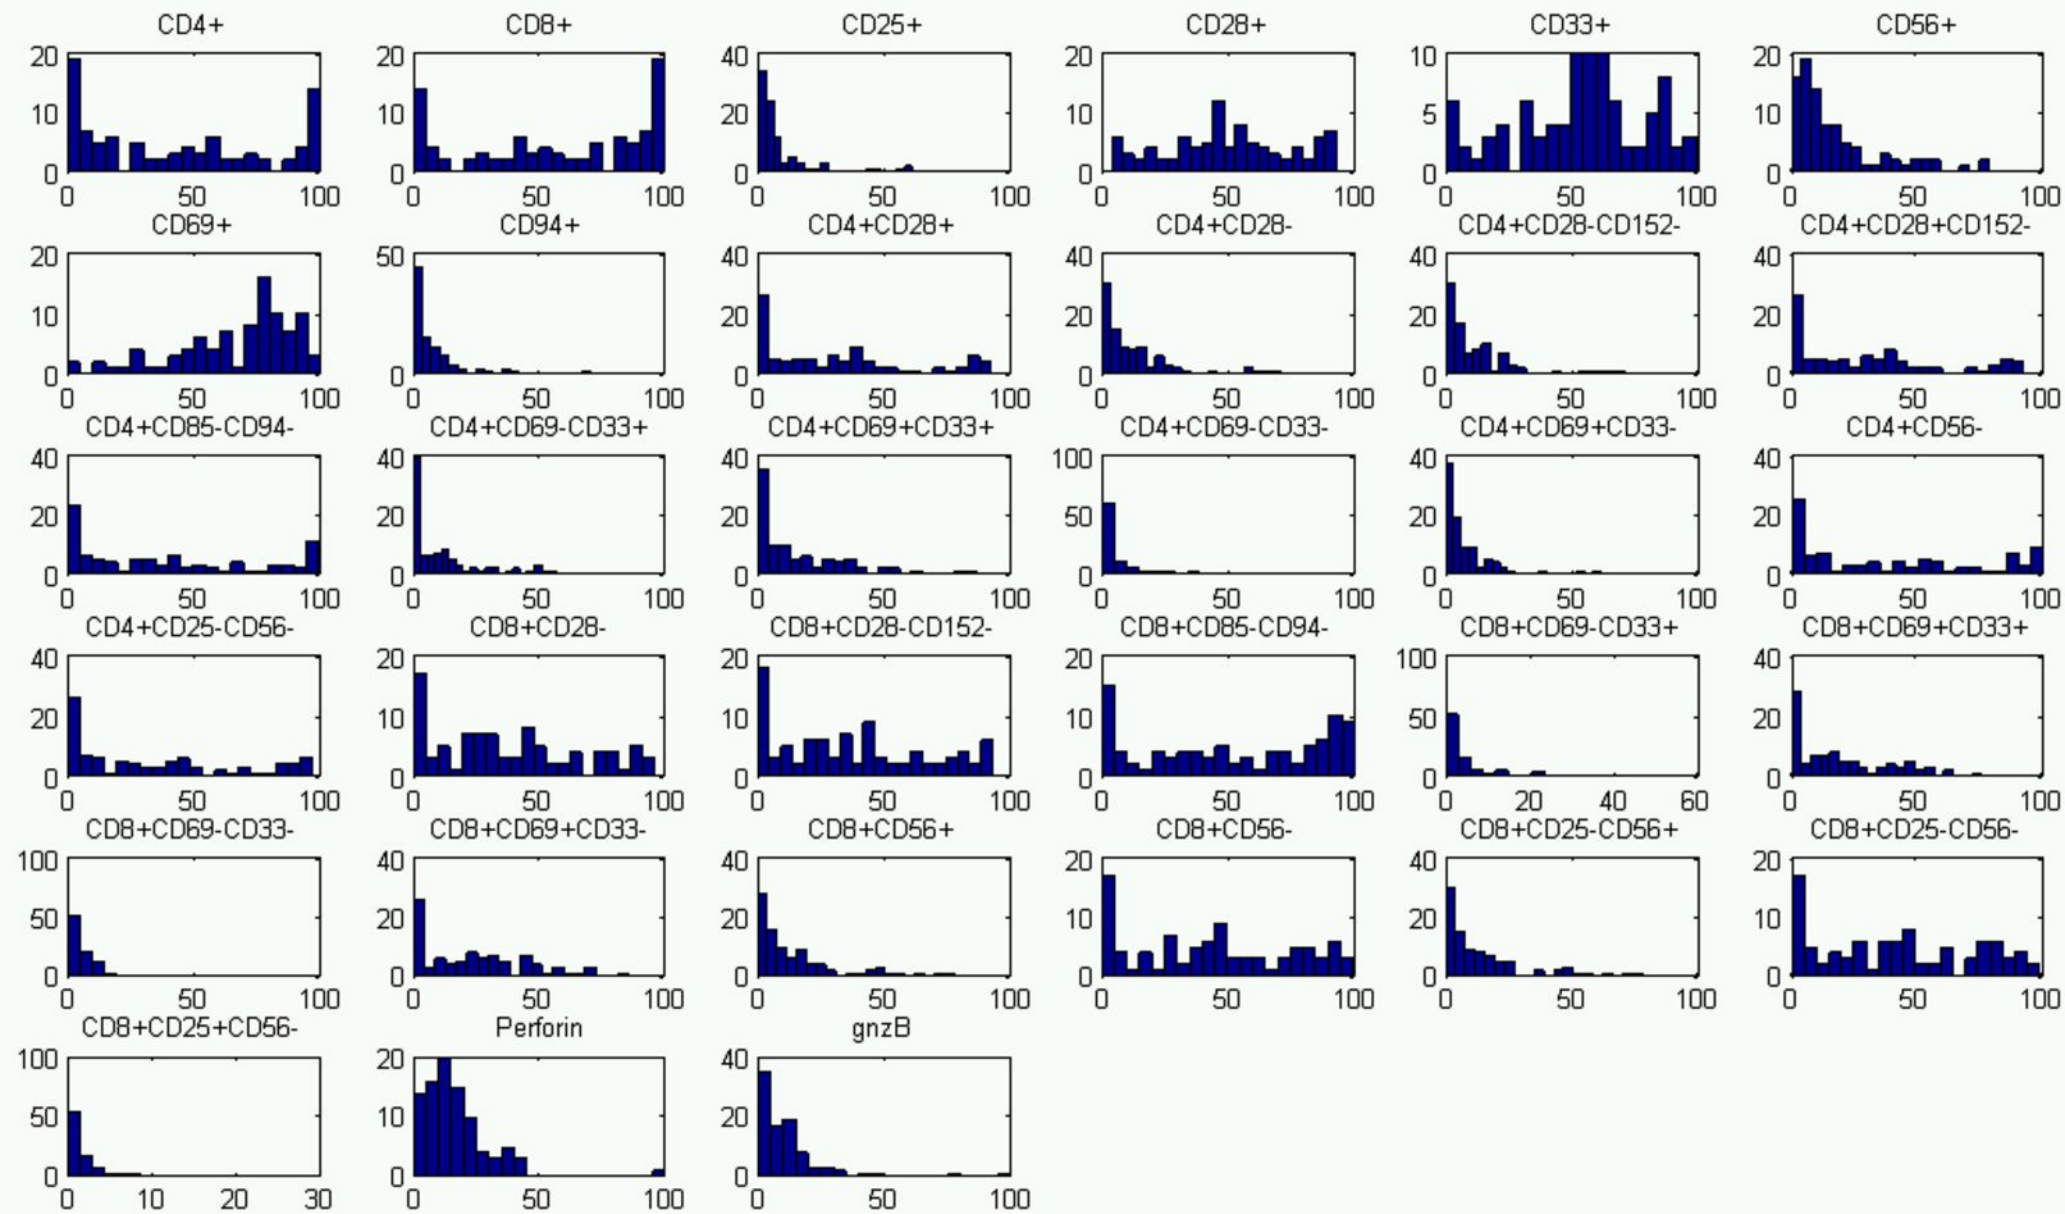

**Figure S3**

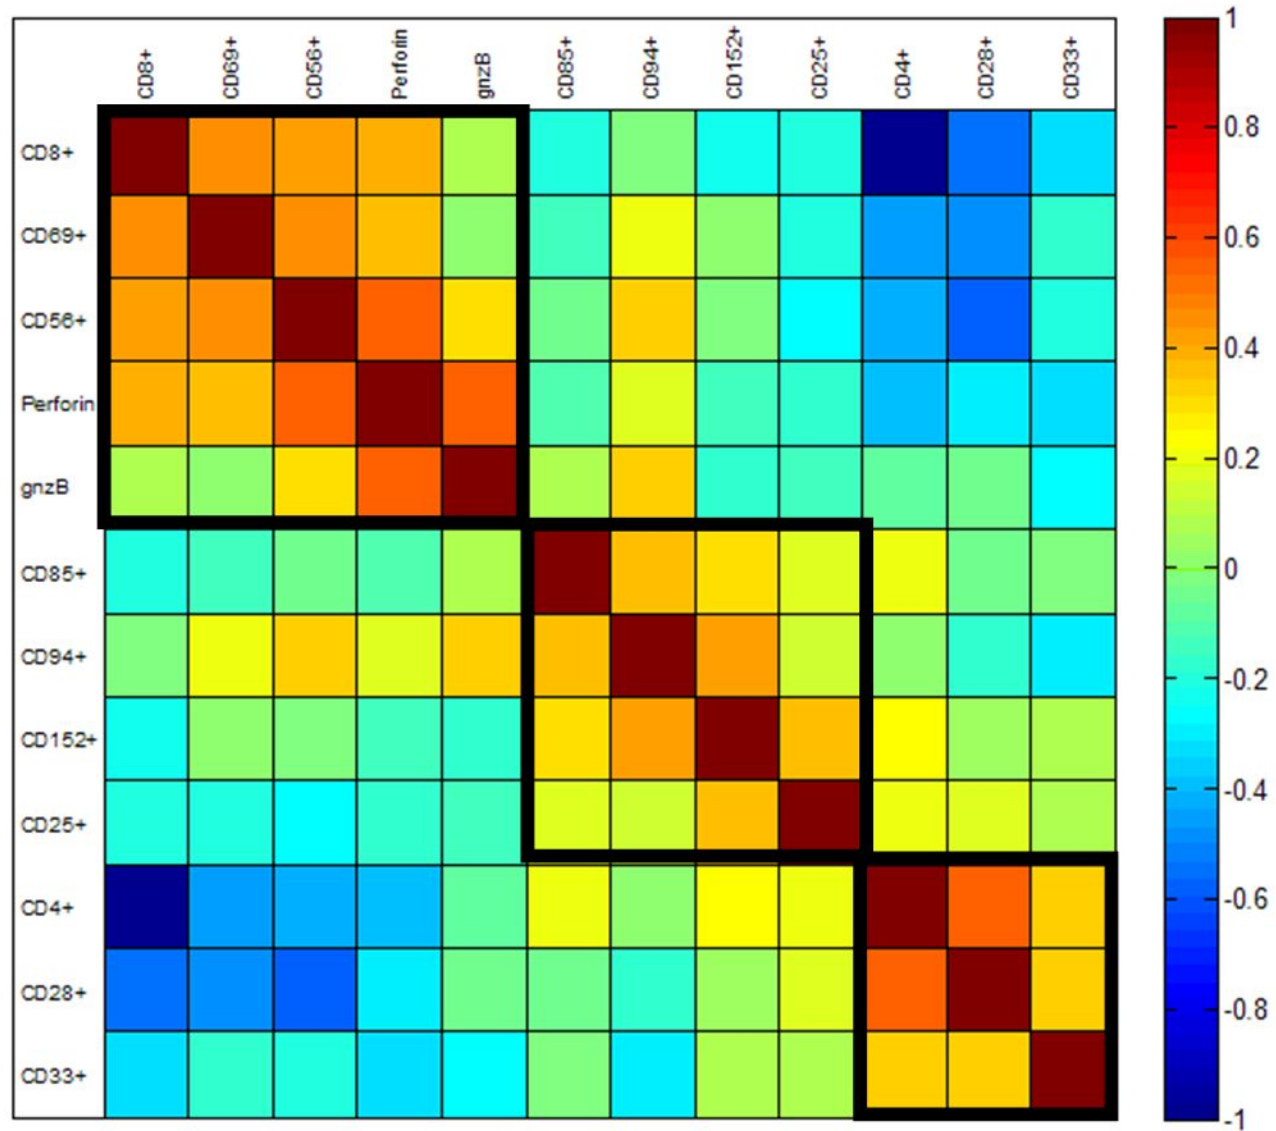

pc # 1

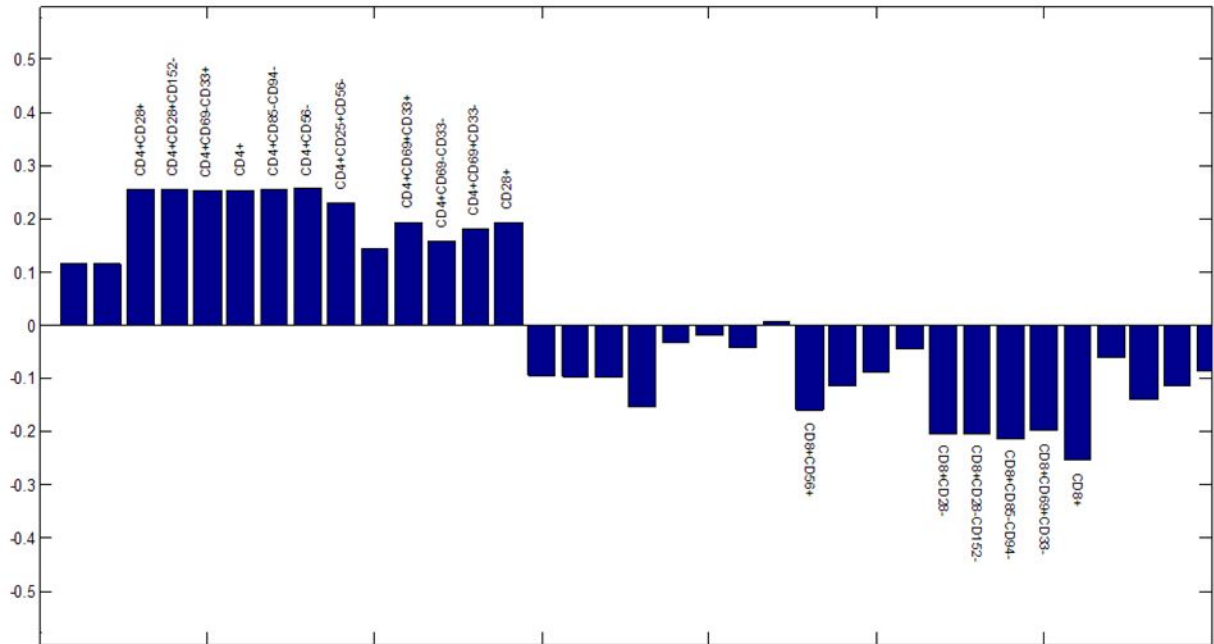



**A**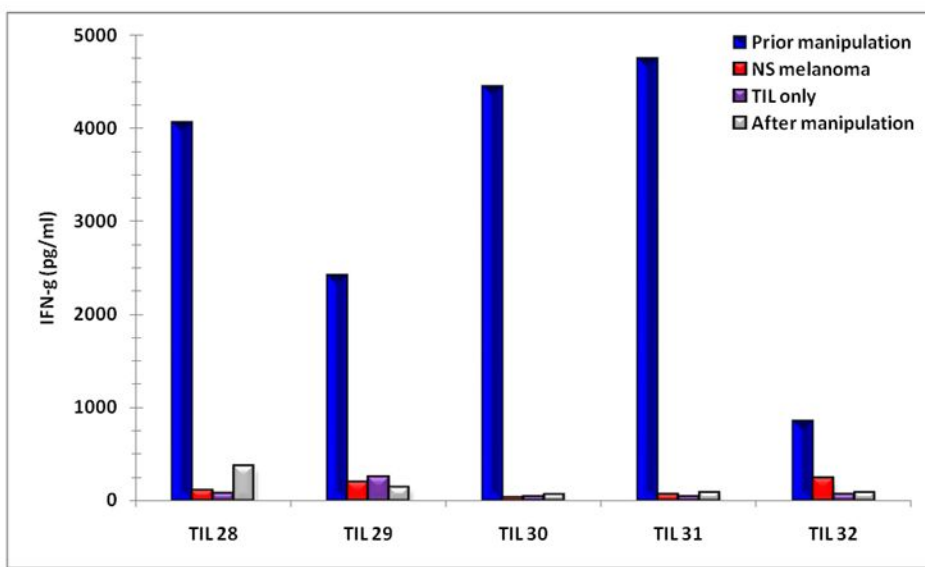**B**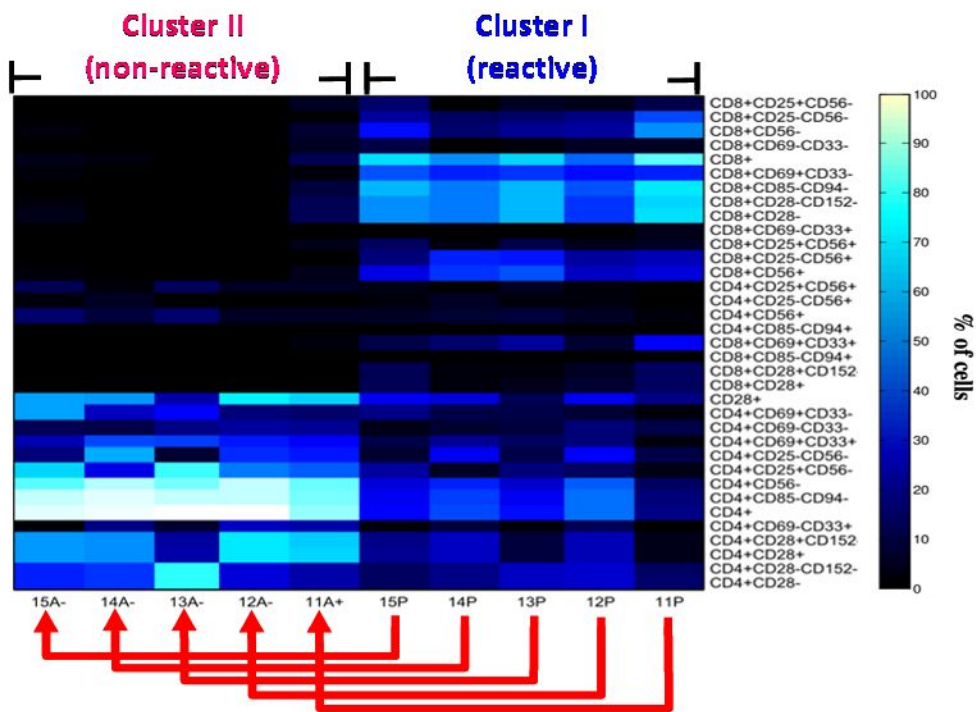**C**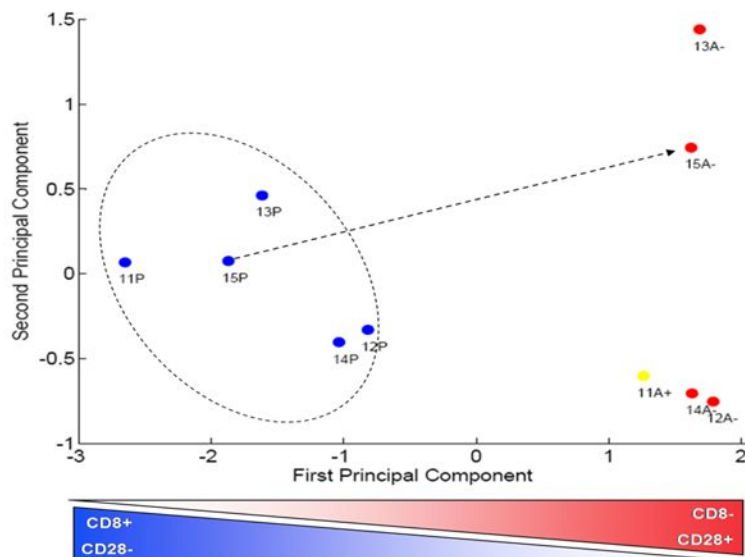

**Table S1**

| Patient ID | no. | TIL I.4 | IFN- $\gamma$ pg/ml | TIL reactivity |
|------------|-----|---------|---------------------|----------------|
| 1          | 1   | 1.1     | 2709                | Reactive       |
|            | 2   | 1.2     | 513                 | Reactive       |
|            | 3   | 1.3     | 0                   | Non-Reactive   |
|            | 4   | 1.4     | 50                  | Non-Reactive   |
| 2          | 5   | 2.1     | 5984                | Reactive       |
|            | 6   | 2.2     | 5234                | Reactive       |
|            | 7   | 2.3     | 155                 | Non-Reactive   |
| 3          | 8   | 2.4     | 188                 | Non-Reactive   |
|            | 9   | 3.1     | 235                 | Reactive       |
|            | 10  | 3.2     | 1742                | Reactive       |
| 4          | 11  | 3.3     | 180                 | Non-Reactive   |
|            | 12  | 3.4     | 155                 | Non-Reactive   |
|            | 13  | 4.1     | 1837                | Reactive       |
| 5          | 14  | 4.2     | 704                 | Reactive       |
|            | 15  | 4.3     | 0                   | Non-Reactive   |
|            | 16  | 4.4     | 0                   | Non-Reactive   |
| 6          | 17  | 5.1     | 209                 | Reactive       |
|            | 18  | 5.2     | 1412                | Reactive       |
|            | 19  | 5.3     | 0                   | Non-Reactive   |
| 7          | 20  | 5.4     | 50                  | Non-Reactive   |
|            | 21  | 6.1     | 778                 | Reactive       |
|            | 22  | 6.2     | 1608                | Reactive       |
| 8          | 23  | 6.3     | 0                   | Non-Reactive   |
|            | 24  | 6.4     | 226                 | Reactive       |
|            | 25  | 7.1     | 142                 | Non-Reactive   |
| 9          | 26  | 7.2     | 113                 | Non-Reactive   |
|            | 27  | 7.3     | 134                 | Non-Reactive   |
|            | 28  | 7.4     | 0                   | Non-Reactive   |
| 10         | 29  | 8.1     | 10000               | Reactive       |
|            | 30  | 8.2     | 6488                | Reactive       |
|            | 31  | 8.3     | 3851                | Reactive       |
| 11         | 32  | 8.4     | 174                 | Non-Reactive   |
|            | 33  | 9.1     | 0                   | Non-Reactive   |
|            | 34  | 9.2     | 119                 | Non-Reactive   |
| 12         | 35  | 9.3     | 112                 | Non-Reactive   |
|            | 36  | 9.4     | 134                 | Non-Reactive   |
|            | 37  | 10.1    | 50                  | Non-Reactive   |
| 13         | 38  | 10.2    | 0                   | Non-Reactive   |
|            | 39  | 11.1    | 256                 | Reactive       |
|            | 40  | 11.2    | 712                 | Reactive       |
| 14         | 41  | 11.3    | 125                 | Non-Reactive   |
|            | 42  | 11.4    | 125                 | Non-Reactive   |
|            | 43  | 12.1    | 1878                | Reactive       |
| 15         | 44  | 12.2    | 4352                | Reactive       |
|            | 45  | 12.3    | 1753                | Reactive       |
|            | 46  | 12.4    | 0                   | Non-Reactive   |
| 16         | 47  | 12.5    | 0                   | Non-Reactive   |

|    |    |      |       |              |
|----|----|------|-------|--------------|
| 13 | 48 | 13.1 | 131   | Non-Reactive |
|    | 49 | 13.2 | 99    | Non-Reactive |
| 14 | 50 | 14.1 | 0     | Non-Reactive |
|    | 51 | 14.2 | 0     | Non-Reactive |
| 15 | 52 | 15.1 | 1354  | Reactive     |
|    | 53 | 15.2 | 6532  | Reactive     |
|    | 54 | 15.3 | 0     | Non-Reactive |
| 16 | 55 | 15.4 | 0     | Non-Reactive |
|    | 56 | 16.1 | 1612  | Reactive     |
|    | 57 | 16.2 | 3011  | Reactive     |
| 17 | 58 | 16.3 | 0     | Non-Reactive |
|    | 59 | 16.4 | 0     | Non-Reactive |
|    | 60 | 17.1 | 50    | Non-Reactive |
| 18 | 61 | 17.2 | 50    | Non-Reactive |
|    | 62 | 18.1 | 0     | Non-Reactive |
| 19 | 63 | 18.2 | 145   | Non-Reactive |
|    | 64 | 19.1 | 2659  | Reactive     |
| 20 | 65 | 19.2 | 6000  | Reactive     |
|    | 66 | 19.3 | 0     | Non-Reactive |
| 21 | 67 | 20.1 | 10000 | Reactive     |
|    | 68 | 20.2 | 0     | Non-Reactive |
|    | 69 | 20.3 | 0     | Non-Reactive |
| 22 | 70 | 21.1 | 1159  | Reactive     |
|    | 71 | 21.2 | 3542  | Reactive     |
|    | 72 | 21.3 | 0     | Non-Reactive |
| 23 | 73 | 21.4 | 0     | Non-Reactive |
|    | 74 | 22.1 | 950   | Reactive     |
|    | 75 | 22.2 | 1621  | Reactive     |
| 24 | 76 | 22.3 | 0     | Non-Reactive |
|    | 77 | 23.1 | 288   | Reactive     |
| 25 | 78 | 23.2 | 2141  | Reactive     |
|    | 79 | 24.1 | 0     | Non-Reactive |
| 26 | 80 | 24.2 | 0     | Non-Reactive |
|    | 81 | 25.1 | 784   | Reactive     |
|    | 82 | 25.2 | 704   | Reactive     |
| 27 | 83 | 25.3 | 75    | Non-Reactive |
|    | 84 | 25.4 | 84    | Non-Reactive |
|    | 85 | 26.1 | 168   | Non-Reactive |
| 28 | 86 | 26.2 | 1351  | Reactive     |
|    | 87 | 26.3 | 1245  | Reactive     |
|    | 88 | 26.4 | 0     | Non-Reactive |
| 29 | 89 | 27.1 | 4750  | Reactive     |
|    | 90 | 27.2 | 142   | Non-Reactive |
|    | 91 | 27.3 | 135   | Non-Reactive |

# Table SII

**A**

| Single staining | Double staining | Triple staining           |
|-----------------|-----------------|---------------------------|
| CD4+            | CD4+CD28+       | CD4+ CD8- CD28- CD152-    |
| CD4 - (-CD8+)   | CD4+CD28-       | CD4+ CD8- CD28- CD152+    |
| CD8+            | CD4+CD152+      | CD4+ CD8- CD28+ CD152-    |
| CD8 - (-CD4+)   | CD4+CD152-      | CD4+ CD8- CD28+ CD152+    |
| CD25+           | CD8+CD28+       | CD4- CD8+ CD28- CD152-    |
| CD25 -          | CD8+CD28-       | CD4- CD8+ CD28- CD152+    |
| CD28+           | CD8+CD152+      | CD4- CD8+ CD28+ CD152-    |
| CD28 -          | CD8+CD152-      | CD4- CD8+ CD28+ CD152+    |
| CD33+           | CD4+CD25+       | CD4+ CD8- CD25- CD56-     |
| CD33 -          | CD4+CD25-       | CD4+ CD8- CD25- CD56+     |
| CD45R0+         | CD4+CD56+       | CD4+ CD8- CD25+ CD56-     |
| CD45R0 -        | CD4+CD56-       | CD4+ CD8- CD25+ CD56+     |
| CD45RA+         | CD8+CD25+       | CD4- CD8+ CD25- CD56-     |
| CD45RA -        | CD8+CD25-       | CD4- CD8+ CD25- CD56+     |
| CD56+           | CD8+CD56+       | CD4- CD8+ CD25+ CD56-     |
| CD56 -          | CD8+CD56-       | CD4- CD8+ CD25+ CD56+     |
| CD69+           | CD4+CD69+       | CD4+ CD8- CD33- CD69-     |
| CD69 -          | CD4+CD69-       | CD4+ CD8- CD33- CD69+     |
| CD85+           | CD4+CD33+       | CD4+ CD8- CD33+ CD69-     |
| CD85 -          | CD4+CD33-       | CD4+ CD8- CD33+ CD69+     |
| CD94+           | CD8+CD69+       | CD4- CD8+ CD33- CD69-     |
| CD94 -          | CD8+CD69-       | CD4- CD8+ CD33- CD69+     |
| CD152+          | CD8+CD33+       | CD4- CD8+ CD33+ CD69-     |
| CD152 -         | CD8+CD33-       | CD4- CD8+ CD33+ CD69+     |
|                 | CD4+CD85+       | CD4+ CD8- CD85- CD94-     |
|                 | CD4+CD85-       | CD4+ CD8- CD85- CD94+     |
|                 | CD4+CD94+       | CD4+ CD8- CD85+ CD94-     |
|                 | CD4+CD94-       | CD4+ CD8- CD85+ CD94+     |
|                 | CD8+CD85+       | CD4- CD8 CD85- CD94-      |
|                 | CD8+CD85-       | CD4- CD8 CD85- CD94+      |
|                 | CD8+CD94+       | CD4- CD8 CD85+ CD94-      |
|                 | CD8+CD94-       | CD4- CD8 CD85+ CD94+      |
|                 | CD4+CD45RA+     | CD4+ CD8- CD45R0- CD45RA- |
|                 | CD4+CD45RA-     | CD4+ CD8- CD45R0- CD45RA+ |
|                 | CD4+CD45R0+     | CD4+ CD8- CD45R0+ CD45RA- |
|                 | CD4+CD45R0-     | CD4+ CD8- CD45R0+ CD45RA+ |
|                 | CD8+CD45RA+     | CD4- CD8+ CD45R0- CD45RA- |
|                 | CD8+CD45RA-     | CD4- CD8+ CD45R0- CD45RA+ |
|                 | CD8+CD45R0+     | CD4- CD8+ CD45R0+ CD45RA- |
|                 | CD8+CD45R0-     | CD4- CD8+ CD45R0+ CD45RA+ |

**B**

| Single staining | Double staining | Triple staining   |
|-----------------|-----------------|-------------------|
| CD4+            | CD4+ CD28+      | CD4+ CD85- CD94-  |
| CD8+            | CD4+ CD28-      | CD4+ CD69- CD33+  |
| CD25+           | CD4+ CD56-      | CD4+ CD69+ CD33+  |
| CD28+           | CD8+ CD28-      | CD4+ CD69- CD33-  |
| CD33+           | CD8+ CD56+      | CD4+ CD69+ CD33-  |
| CD56+           | CD8+ CD56-      | CD4+ CD25- CD56-  |
| CD69+           |                 | CD8+ CD85- CD94-  |
| CD94+           |                 | CD8+ CD69- CD33+  |
| Perforin        |                 | CD8+ CD69+ CD33+  |
| ganzB           |                 | CD8+ CD69- CD33-  |
|                 |                 | CD8+ CD69+ CD33-  |
|                 |                 | CD8+ CD25- CD56+  |
|                 |                 | CD8+ CD25- CD56-  |
|                 |                 | CD8+ CD25+ CD56-  |
|                 |                 | CD4+ CD28- CD152- |
|                 |                 | CD8+ CD28- CD152- |

**Table SIII**

|       |              |              | Prior manipulation |       |                       | After manipulation |        |                       | Fold change (Prior/After) |        |                  |
|-------|--------------|--------------|--------------------|-------|-----------------------|--------------------|--------|-----------------------|---------------------------|--------|------------------|
|       |              |              | Before             | After | IFN- $\gamma$ (pg/ml) | CD8(%)             | CD4(%) | IFN- $\gamma$ (pg/ml) | CD8(%)                    | CD4(%) | FC IFN- $\gamma$ |
| TIL1  | non reactive | reactive     | 125                | 20.72 | 79.28                 | 4055               | 71.44  | 28.56                 | 32.4                      | 3.4    | 0.4              |
| TIL2  | non reactive | reactive     | 38                 | 42.45 | 57.55                 | 4020               | 88.49  | 11.51                 | 105.8                     | 2.1    | 0.2              |
| TIL3  | non reactive | reactive     | 113                | 51.63 | 48.37                 | 3478               | 89.49  | 10.51                 | 30.8                      | 1.7    | 0.2              |
| TIL4  | non reactive | reactive     | 71                 | 90.85 | 9.15                  | 3308               | 79.26  | 20.74                 | 46.6                      | 0.9    | 2.3              |
| TIL5  | non reactive | reactive     | 110                | 6.42  | 93.58                 | 2886               | 52.05  | 47.95                 | 26.2                      | 8.1    | 0.5              |
| TIL6  | non reactive | reactive     | 0                  | ND    | ND                    | 1388               | ND     | ND                    | ND                        | ND     | ND               |
| TIL7  | non reactive | reactive     | 36                 | 87.45 | 12.55                 | 605                | 87.08  | 12.92                 | 16.8                      | 1.0    | 1.0              |
| TIL8  | non reactive | reactive     | 57                 | 73.19 | 26.81                 | 560                | 92.98  | 7.02                  | 9.8                       | 1.3    | 0.3              |
| TIL9  | non reactive | reactive     | 30                 | 56.78 | 43.22                 | 295                | 71.65  | 28.35                 | 9.8                       | 1.3    | 0.7              |
| TIL10 | non reactive | non reactive | 8                  | 3.56  | 96.44                 | 73                 | 48.98  | 51.02                 | 9.1                       | 13.8   | 0.5              |
| TIL11 | non reactive | non reactive | 25                 | 98.77 | 1.23                  | 24                 | 99.01  | 0.99                  | 1.0                       | 1.0    | 0.8              |
| TIL12 | non reactive | non reactive | 23                 | ND    | ND                    | 0                  | ND     | ND                    | ND                        | ND     | ND               |
